# Supplementary material
Source: MDPI journal article supplement (https://www.mdpi.com/2073-4344/11/11/1409)
Supplement: s1 [file s1]

# Synthesis and Catalytic Properties of Novel Ruthenacarboranes Based on *nido*-[5-Me-7,8-C<sub>2</sub>B<sub>9</sub>H<sub>10</sub>]<sup>2-</sup> and *nido*-[5,6-Me<sub>2</sub>-7,8-C<sub>2</sub>B<sub>9</sub>H<sub>9</sub>]<sup>2-</sup> Dicarbollide Ligands

Ivan D. Grishin <sup>1,\*</sup>, Anastasya M. Zimina <sup>1</sup>, Sergey A. Anufriev <sup>2</sup>, Nadezhda A. Knyaseva <sup>1</sup>, Alexander V. Piskunov <sup>3</sup>, Fedor M. Dolgushin <sup>2,4</sup> and Igor B. Sivaev <sup>2,5\*</sup>

<sup>1</sup> Lobachevsky State University of Nizhny Novgorod, 23 Gagarin Prosp., Nizhny Novgorod, 603950, Russia; grishin\_i@ichem.unn.ru (I.D.G.); (A.M.Z.); (N.A.K.)

<sup>2</sup> A.N. Nesmeyanov Institute of Organoelement Compounds, Russian Academy of Sciences, 28 Vavilov Str., 119991 Moscow, Russia; trueman476@mail.ru (S.A.A.); fedya@ineos.ac.ru (F.M.D.); sivaev@ineos.ac.ru (I.B.S.)

<sup>3</sup> G.A. Razuvaev Institute of Organometallic Chemistry, Russian Academy of Sciences, 49 Tropinin Str., Nizhny Novgorod, 603950, Russia; (A.A.P.)

<sup>4</sup> N.S. Kurnakov Institute of General and Inorganic Chemistry, Russian Academy of Sciences, 31 Leninskii Prosp., 119991 Moscow, Russia

<sup>5</sup> Basic Department of Chemistry of Innovative Materials and Technologies, G.V. Plekhanov Russian University of Economics, 36 Stremyanniy Line, 117997, Moscow, Russia

\* Correspondence: grishin\_i@ichem.unn.ru (I.D.G.); sivaev@ineos.ac.ru (I.B.S.)

**Supplementary Materials:** **Figure S1** <sup>1</sup>H NMR spectrum of 9-methyl-ortho-carborane, **Figure S2** <sup>11</sup>B NMR spectrum of 9-methyl-ortho-carborane, **Figure S3** <sup>11</sup>B{<sup>1</sup>H} NMR spectrum of 9-methyl-ortho-carborane, **Figure S4** <sup>1</sup>H NMR spectrum of 9,12-dimethyl-ortho-carborane, **Figure S5** <sup>11</sup>B NMR spectrum of 9,12-dimethyl-ortho-carborane, **Figure S6** <sup>11</sup>B{<sup>1</sup>H} NMR spectrum of 9,12-dimethyl-ortho-carborane, **Figure S7** <sup>1</sup>H NMR spectrum of cesium 5-methyl-7,8-dicarba-nido-undecaborate (1), **Figure S8** <sup>11</sup>B NMR spectrum of cesium 5-methyl-7,8-dicarba-nido-undecaborate (1), **Figure S9** <sup>11</sup>B{<sup>1</sup>H} NMR spectrum of cesium 5-methyl-7,8-dicarba-nido-undecaborate (1), **Figure S10** <sup>1</sup>H NMR spectrum of cesium 5,6-dimethyl-7,8-dicarba-nido-undecaborate (2), **Figure S11** <sup>11</sup>B NMR spectrum of cesium 5,6-dimethyl-7,8-dicarba-nido-undecaborate (2), **Figure S12** <sup>11</sup>B{<sup>1</sup>H} NMR spectrum of cesium 5,6-dimethyl-7,8-dicarba-nido-undecaborate (2), **Figure S13** <sup>1</sup>H NMR spectrum of complex 3, **Figure S14** <sup>11</sup>B{<sup>1</sup>H} NMR spectrum of complex 3, **Figure S15** <sup>1</sup>H-<sup>1</sup>H 2D COSY NMR spectrum of complex 3, **Figure S16** <sup>1</sup>H-<sup>13</sup>C 2D HSQC NMR spectrum of complex 3, **Figure S17** <sup>1</sup>H NMR spectrum of complex 4, **Figure S18** <sup>11</sup>B{<sup>1</sup>H} NMR spectrum of complex 4, **Figure S19** <sup>1</sup>H-<sup>1</sup>H 2D COSY NMR spectrum of complex 3, **Figure S20** <sup>1</sup>H-<sup>13</sup>C 2D HSQC NMR spectrum of complex 4, **Figure S21** Anisotropic EPR spectrum of complex 7 in toluene matrix at 77 K, **Figure S22** Anisotropic EPR spectrum of complex 9 in toluene matrix at 77 K, **Figure S23** MALDI mass spectrum of complex 3 recorded in negative mode using DCTB as a matrix, **Figure S24** MALDI mass spectrum of complex 4 recorded in negative mode using DCTB as a matrix, **Figure S25** MALDI mass spectrum of complex 6 recorded in negative mode using DCTB as a matrix, **Figure S26** MALDI mass spectrum of complex 7 recorded in negative mode using DCTB as a matrix, **Figure S27** MALDI mass spectrum of complex 8 recorded in negative mode using DCTB as a matrix, **Figure S28** MALDI mass spectrum of complex 9 recorded in negative mode using DCTB as a matrix.

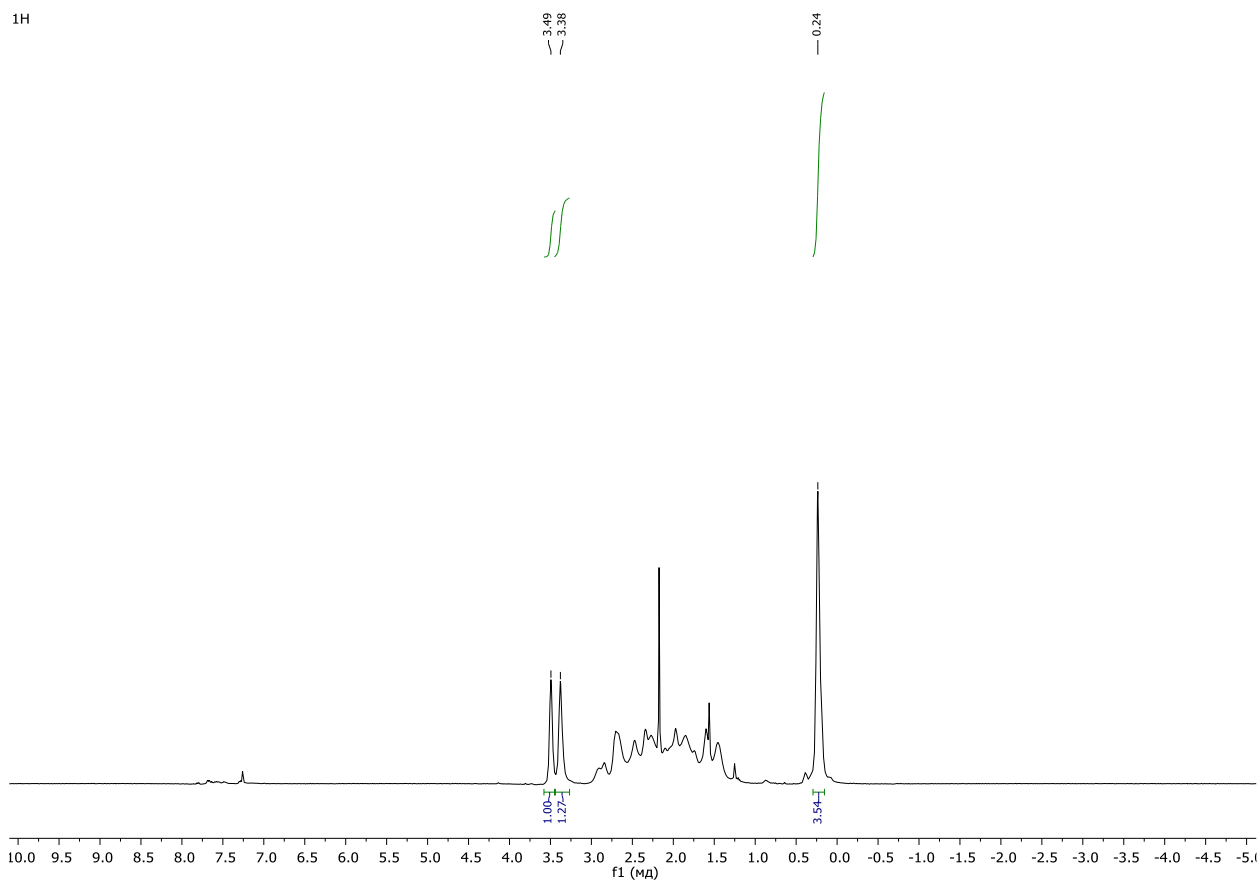

**Figure S1.** <sup>1</sup>H NMR spectrum of 9-methyl-*ortho*-carborane

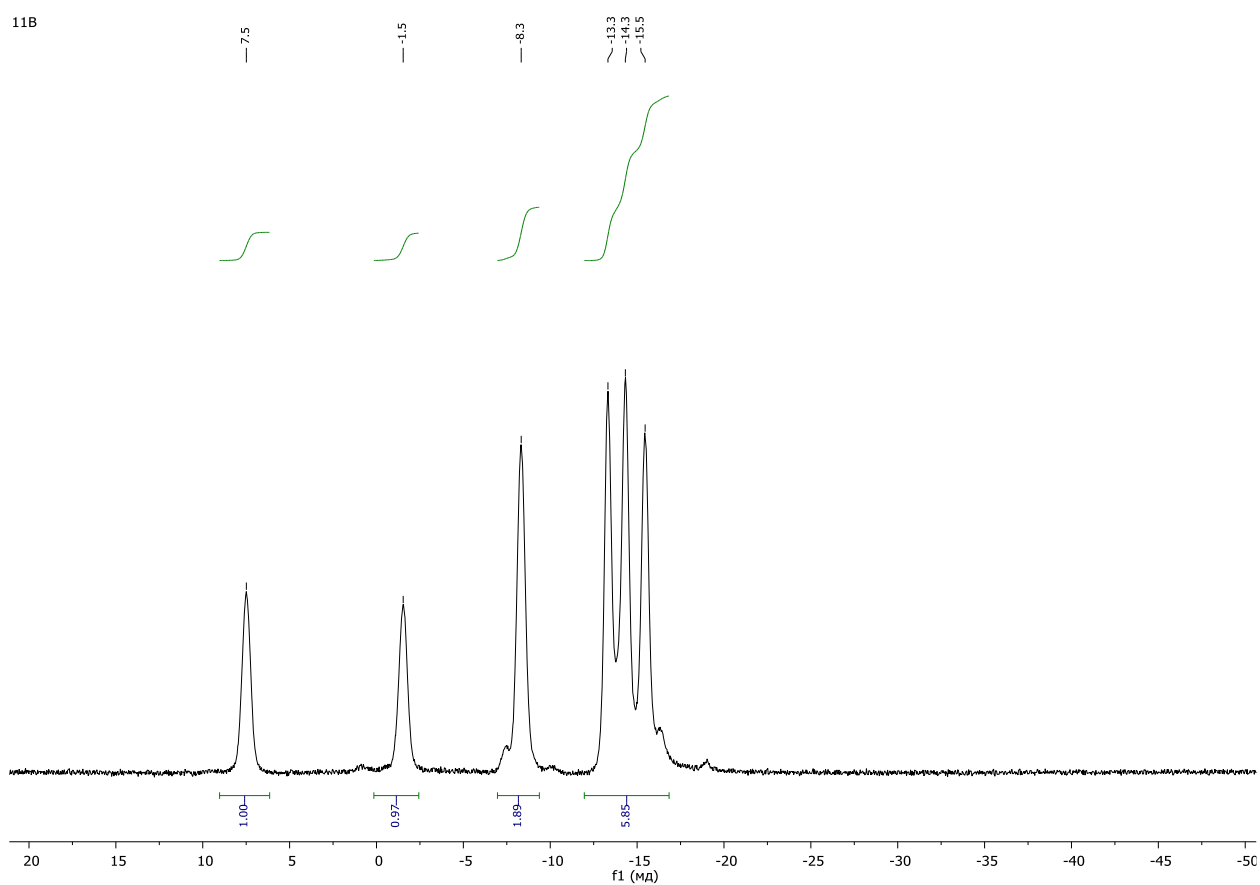

**Figure S2.** <sup>11</sup>B NMR spectrum of 9-methyl-*ortho*-carborane

111B

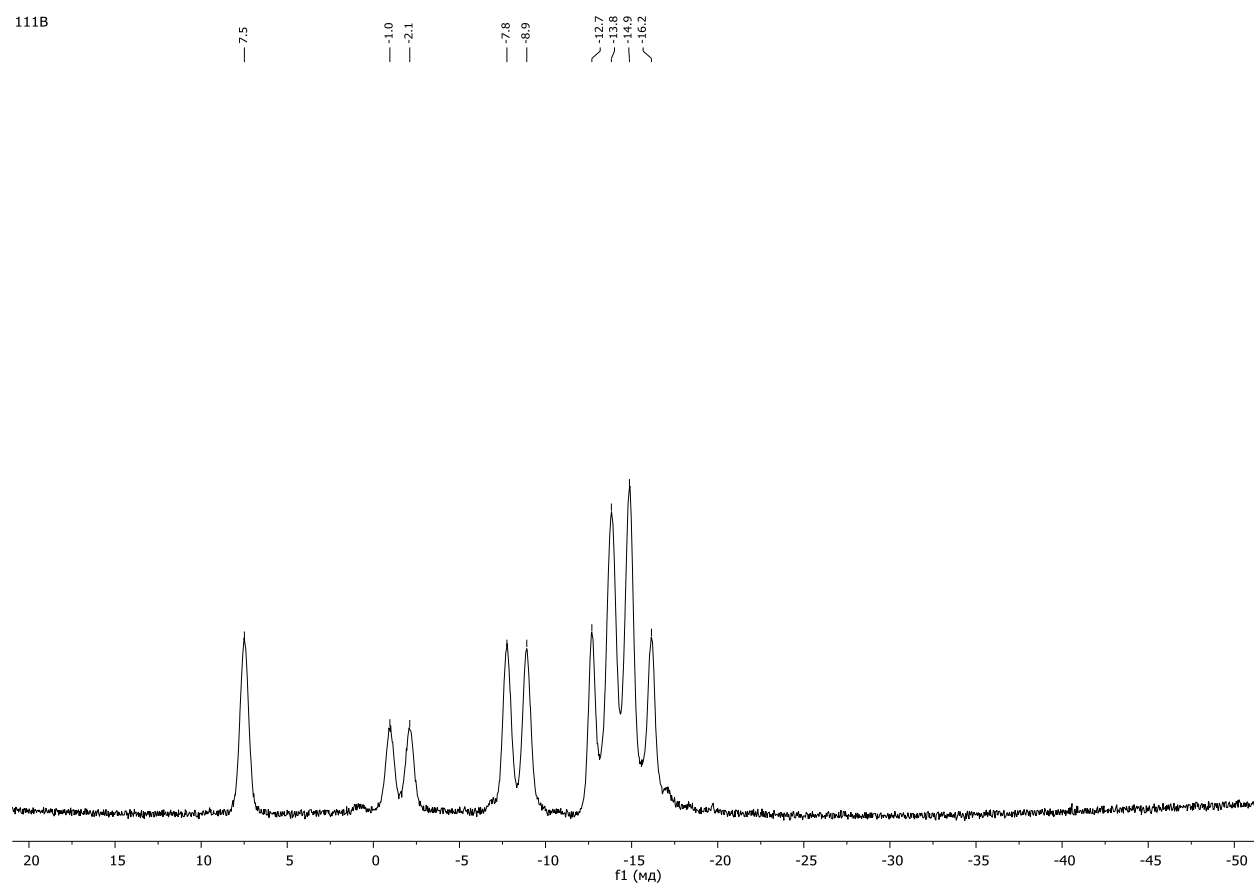

Figure S3.  $^{11}\text{B}\{^1\text{H}\}$  NMR spectrum of 9-methyl-*ortho*-carborane

$^1\text{H}$

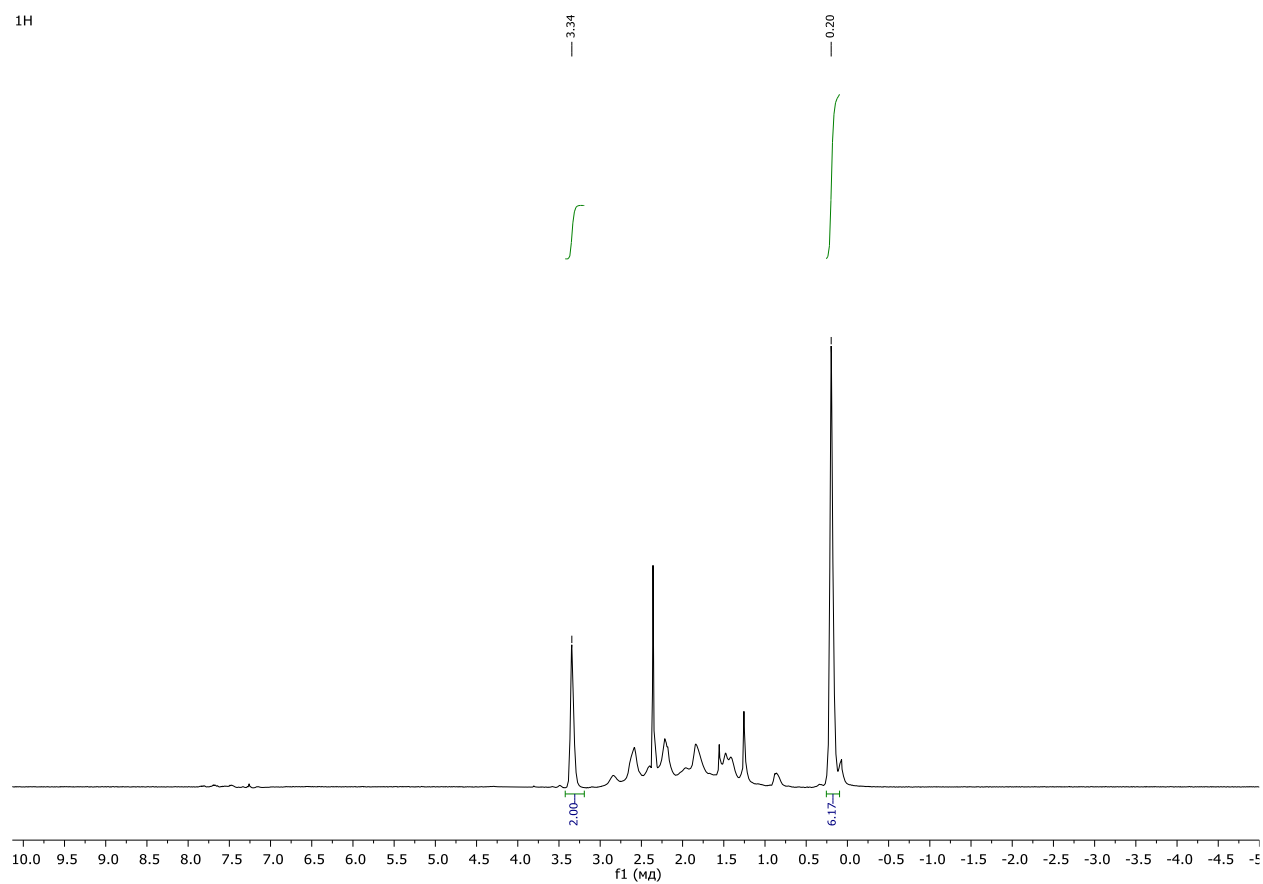

Figure S4.  $^1\text{H}$  NMR spectrum of 9,12-dimethyl-*ortho*-carborane

11B

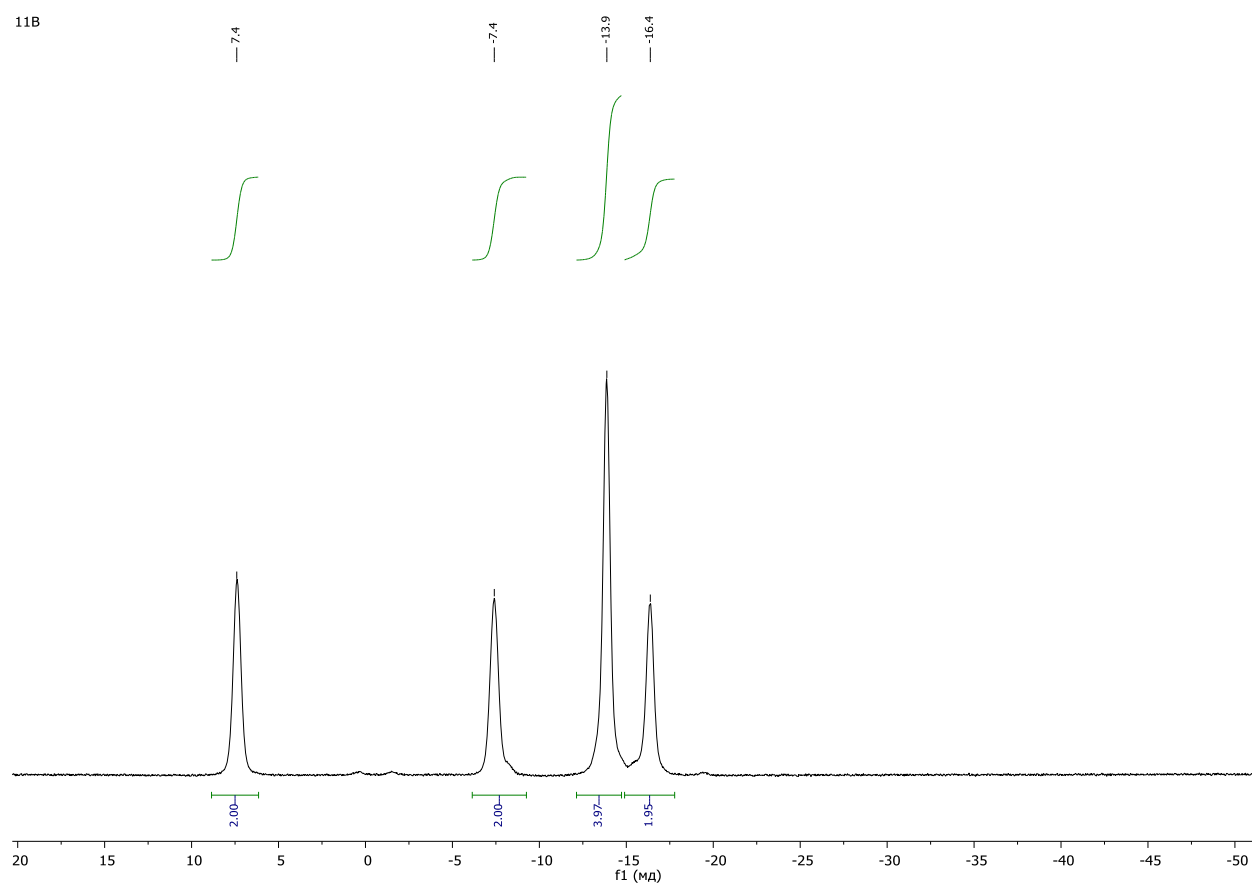

**Figure S5.**  $^{11}\text{B}$  NMR spectrum of 9,12-dimethyl-ortho-carborane

111B

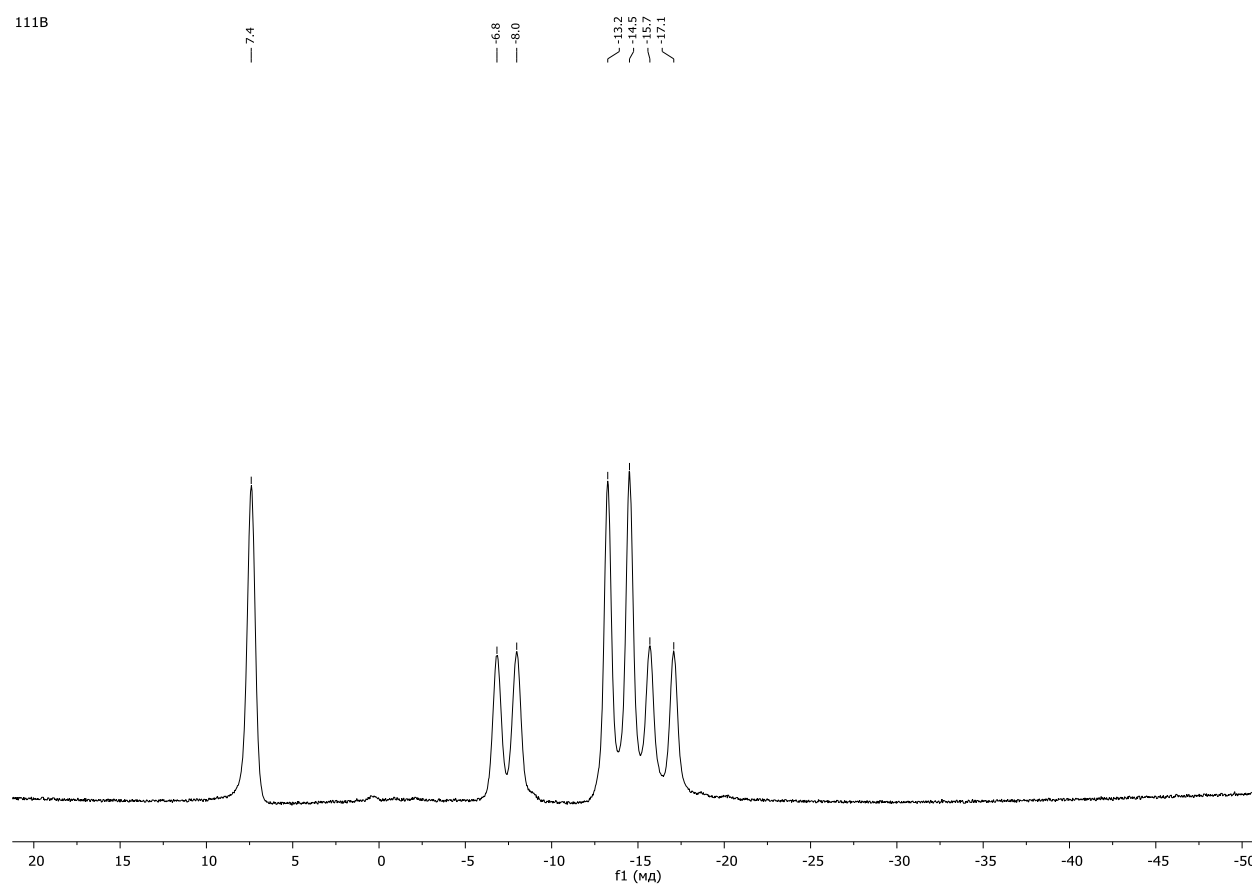

**Figure S6.**  $^{11}\text{B}\{^1\text{H}\}$  NMR spectrum of 9,12-dimethyl-ortho-carborane

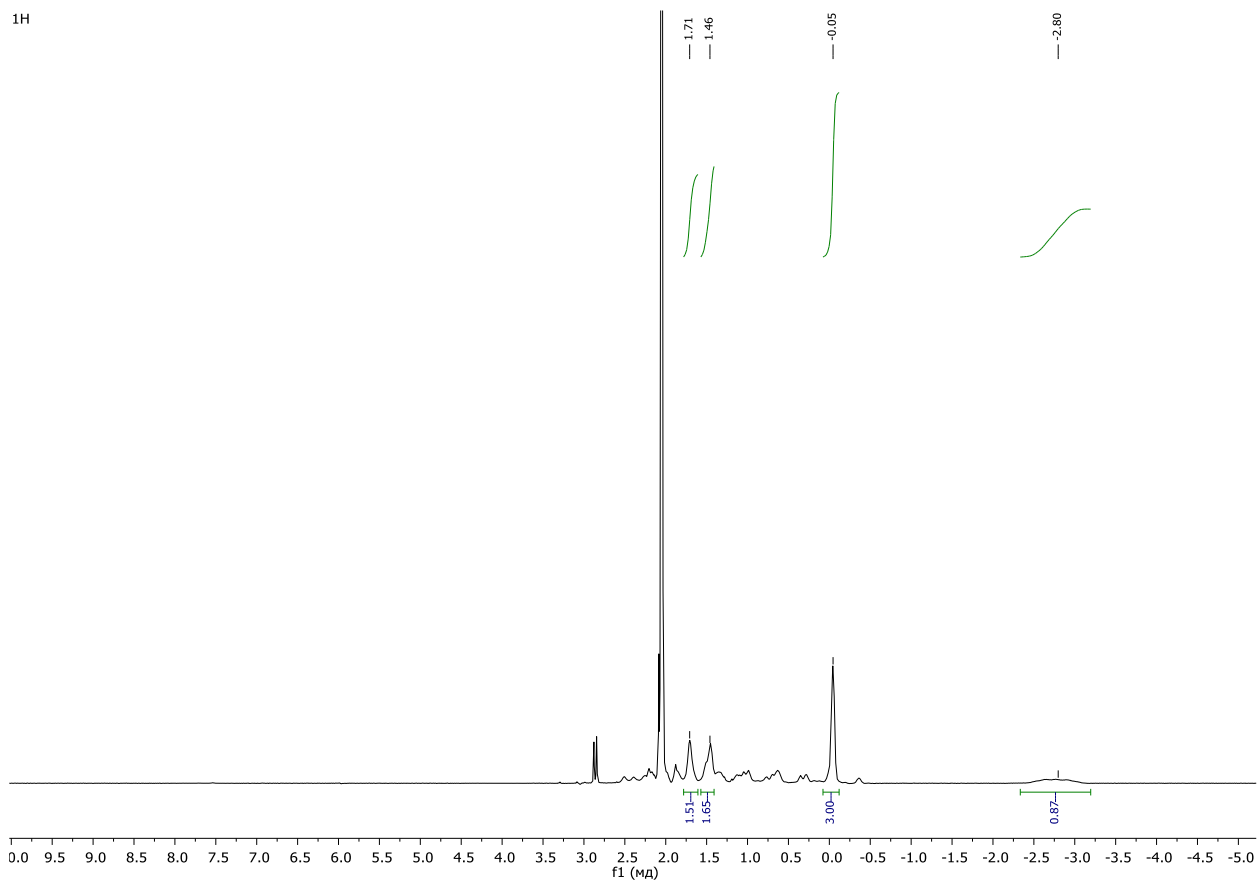

**Figure S7.** <sup>1</sup>H NMR spectrum of cesium 5-methyl-7,8-dicarba-*nido*-undecaborate (**1**).

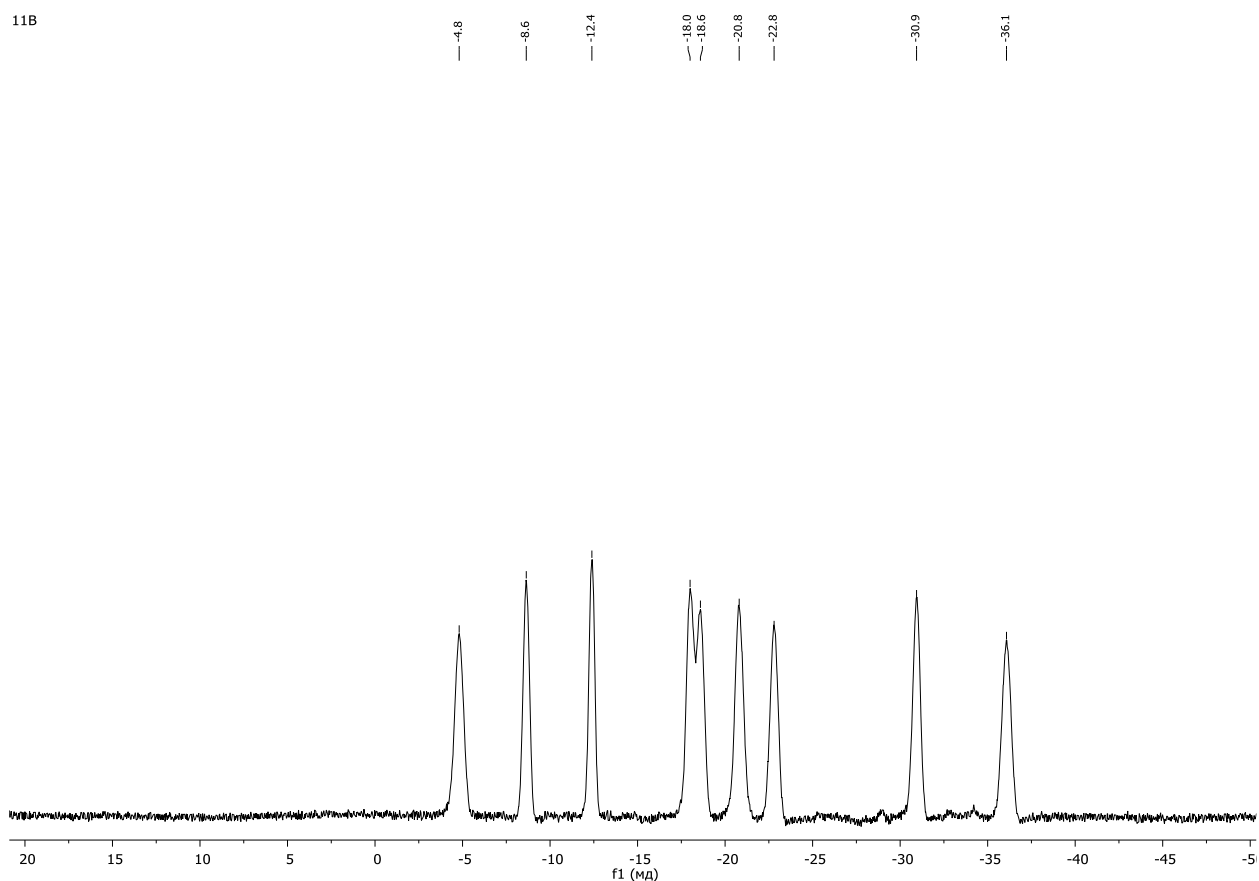

**Figure S8.** <sup>11</sup>B NMR spectrum of cesium 5-methyl-7,8-dicarba-*nido*-undecaborate (**1**).

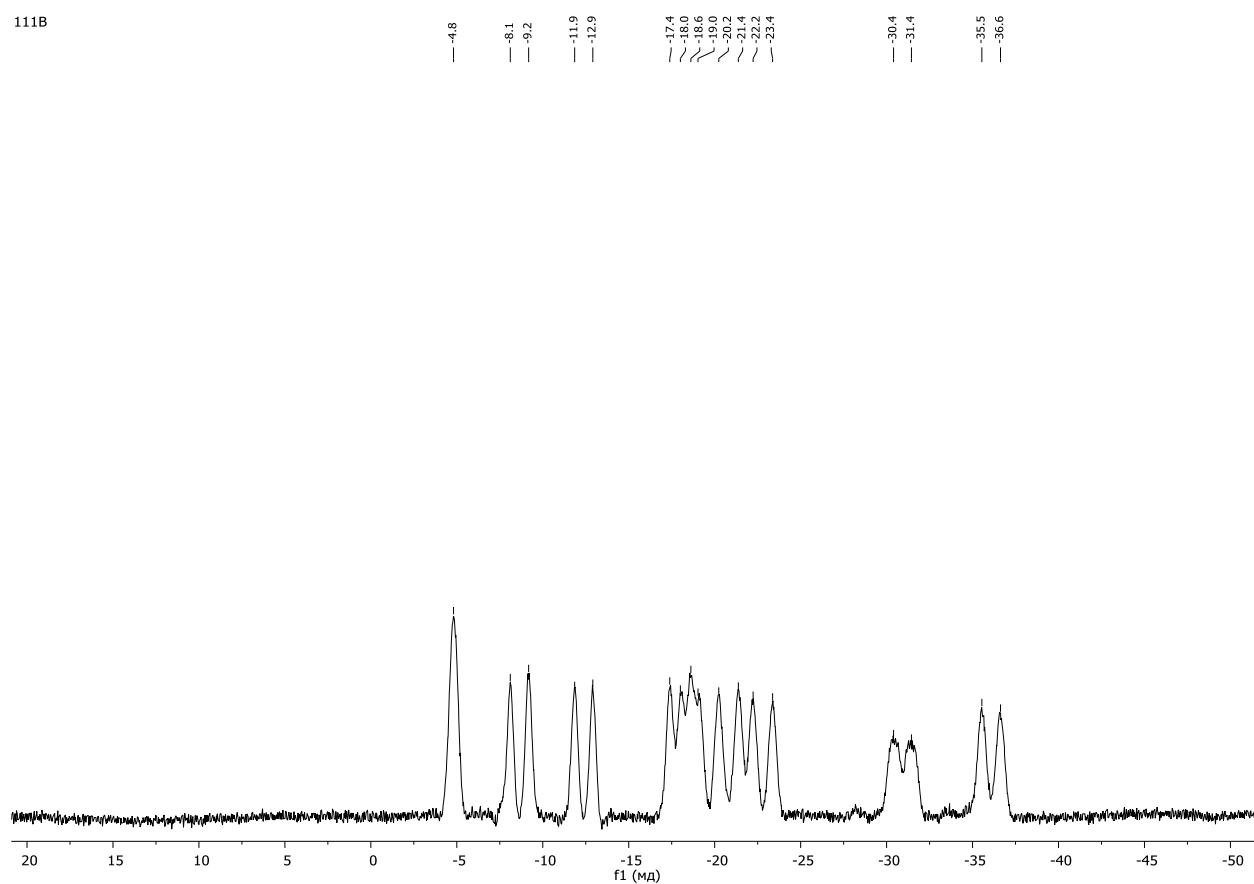

**Figure S9.**  $^{11}\text{B}\{^1\text{H}\}$  NMR spectrum of cesium 5-methyl-7,8-dicarba-*nido*-undecaborate (**1**).

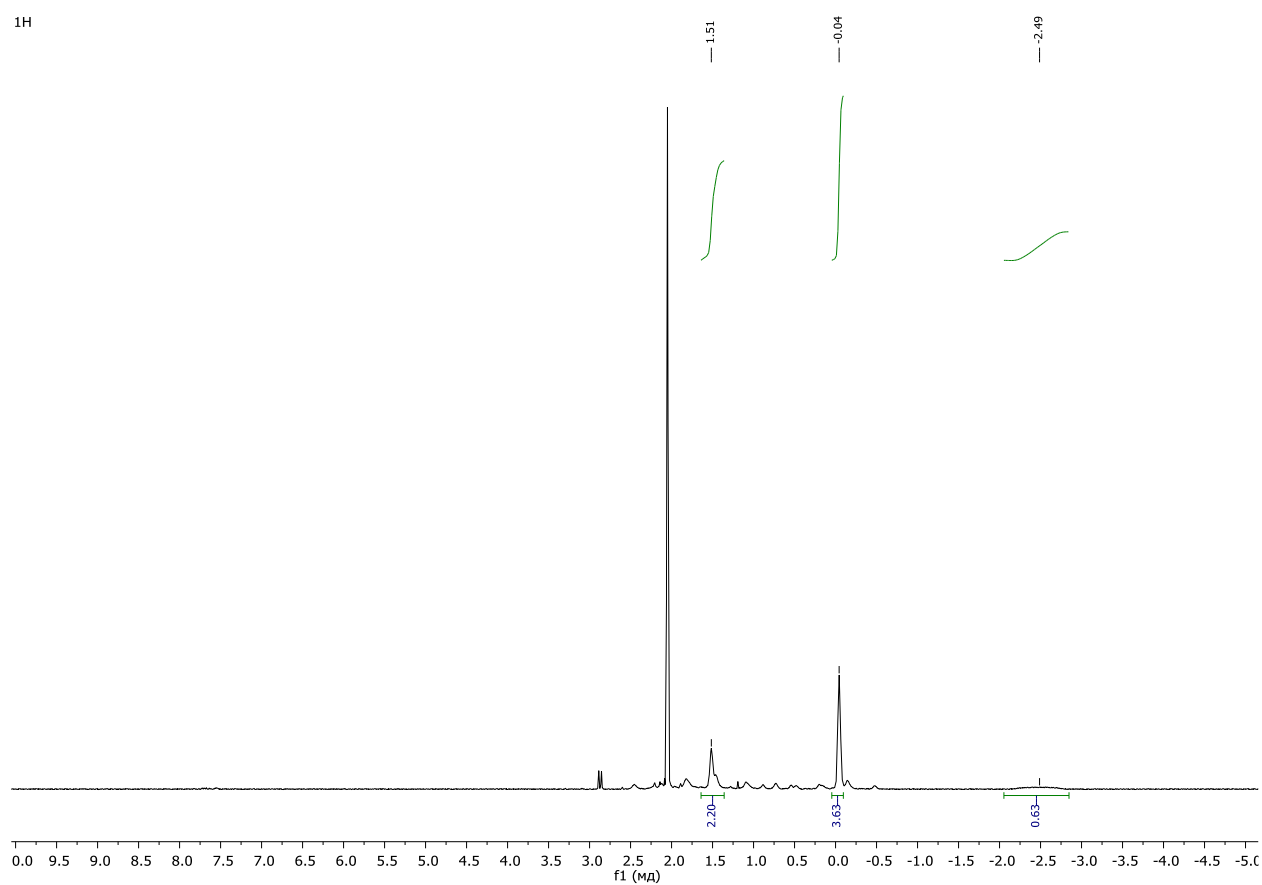

**Figure S10.**  $^1\text{H}$  NMR spectrum of cesium 5,6-dimethyl-7,8-dicarba-*nido*-undecaborate (**2**).

11B

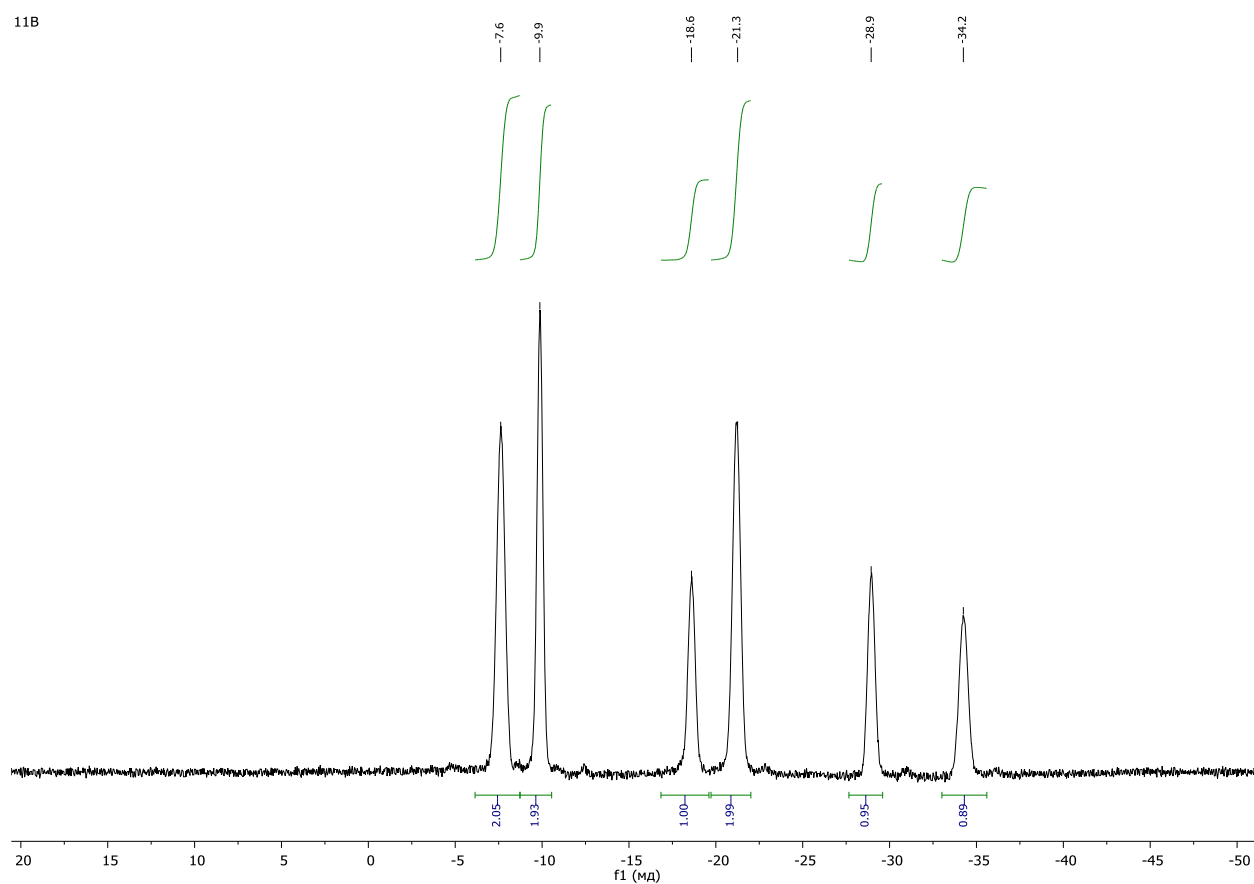

**Figure S11.**  $^{11}\text{B}$  NMR spectrum of cesium 5,6-dimethyl-7,8-dicarba-*nido*-undecaborate (**2**).

11B

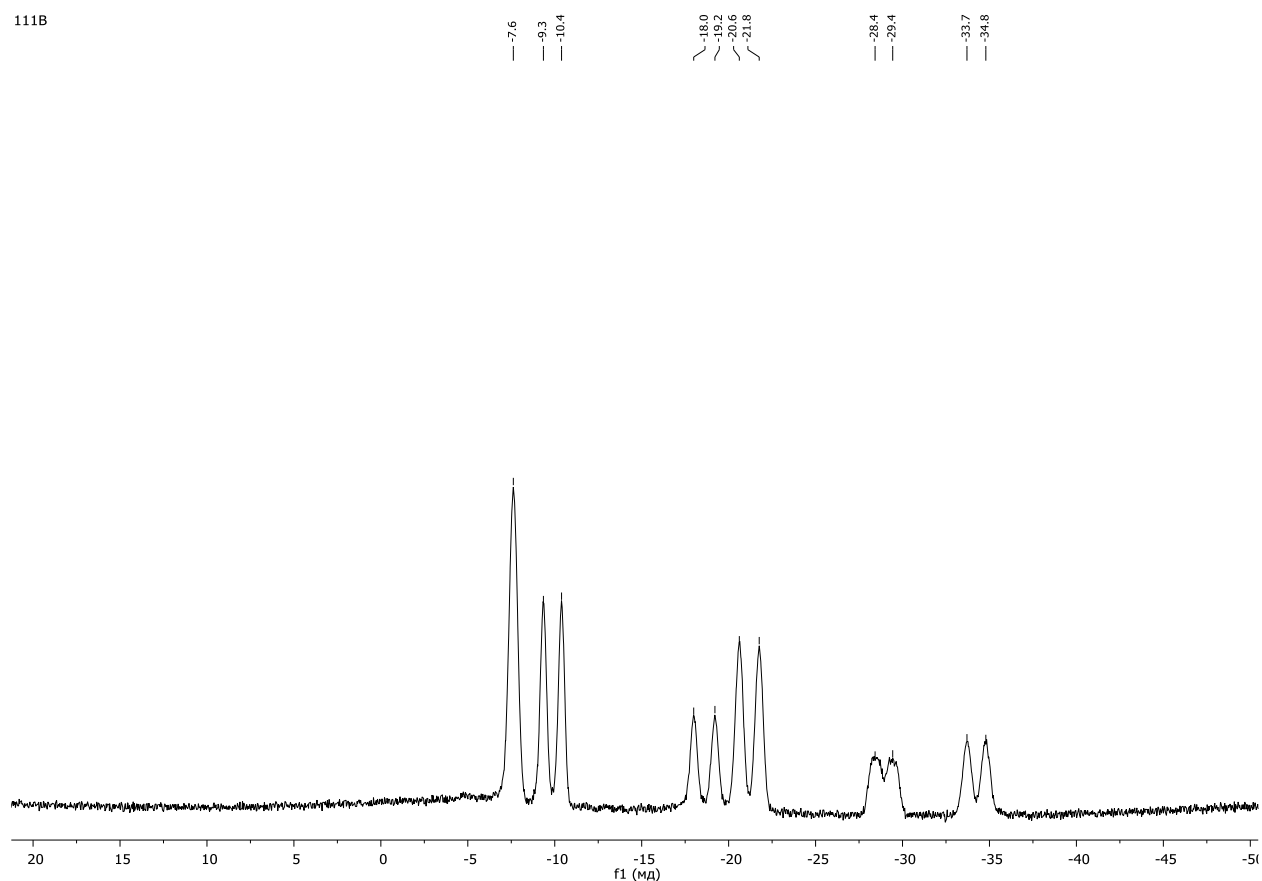

**Figure S12.**  $^{11}\text{B}\{^1\text{H}\}$  NMR spectrum of cesium 5,6-dimethyl-7,8-dicarba-*nido*-undecaborate (**2**).

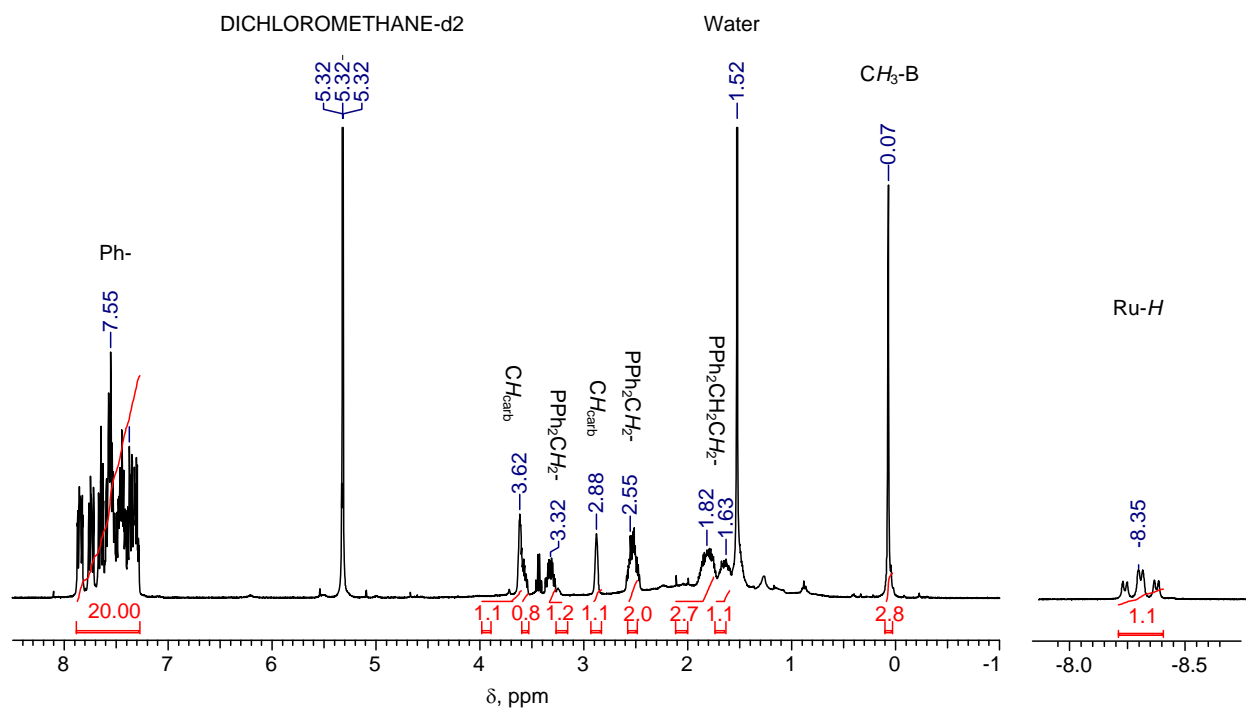

Figure S13.  $^1\text{H}$  NMR spectrum of complex 3

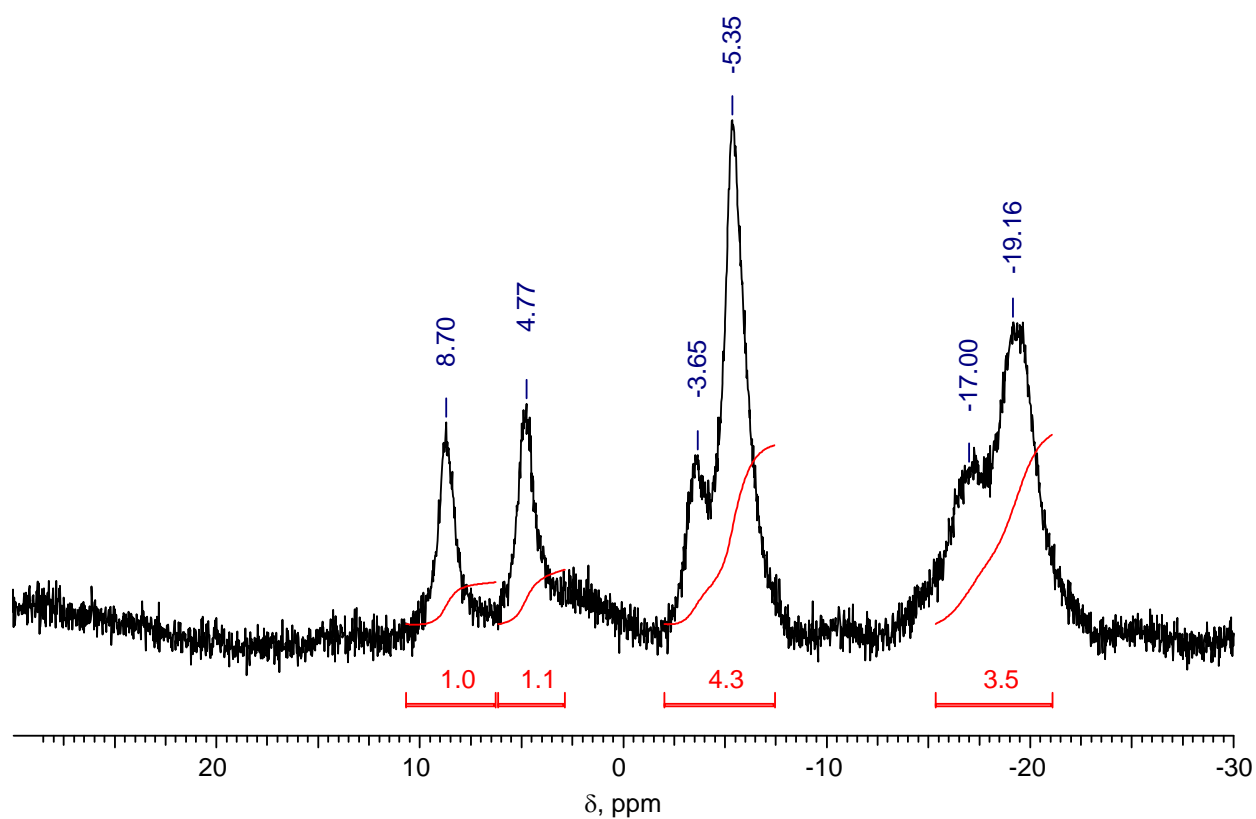

Figure S14.  $^{11}\text{B}\{^1\text{H}\}$  NMR spectrum of complex 3



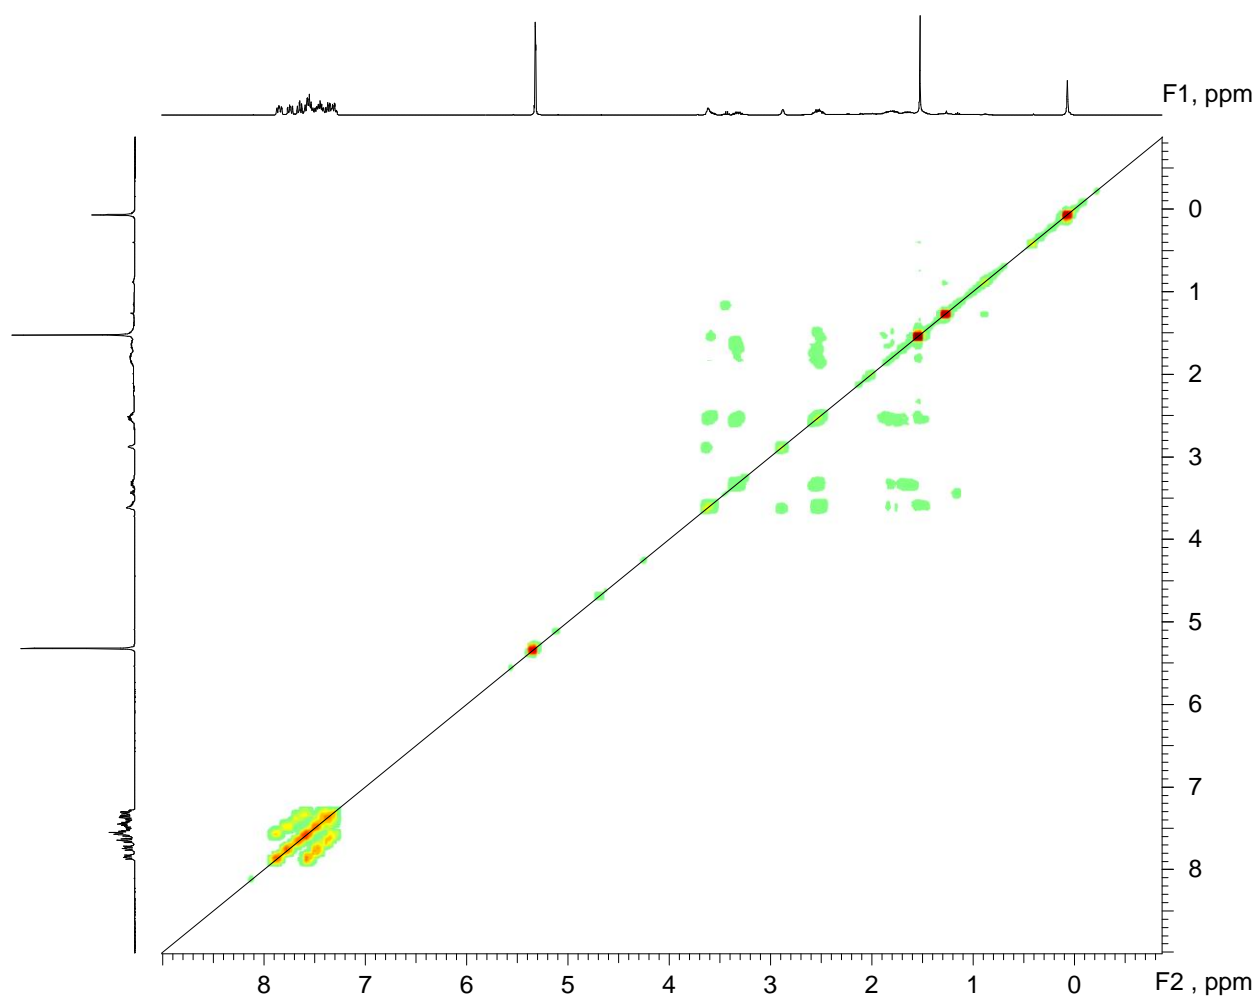

**Figure S15.** <sup>1</sup>H-<sup>1</sup>H 2D COSY NMR spectrum of complex 3

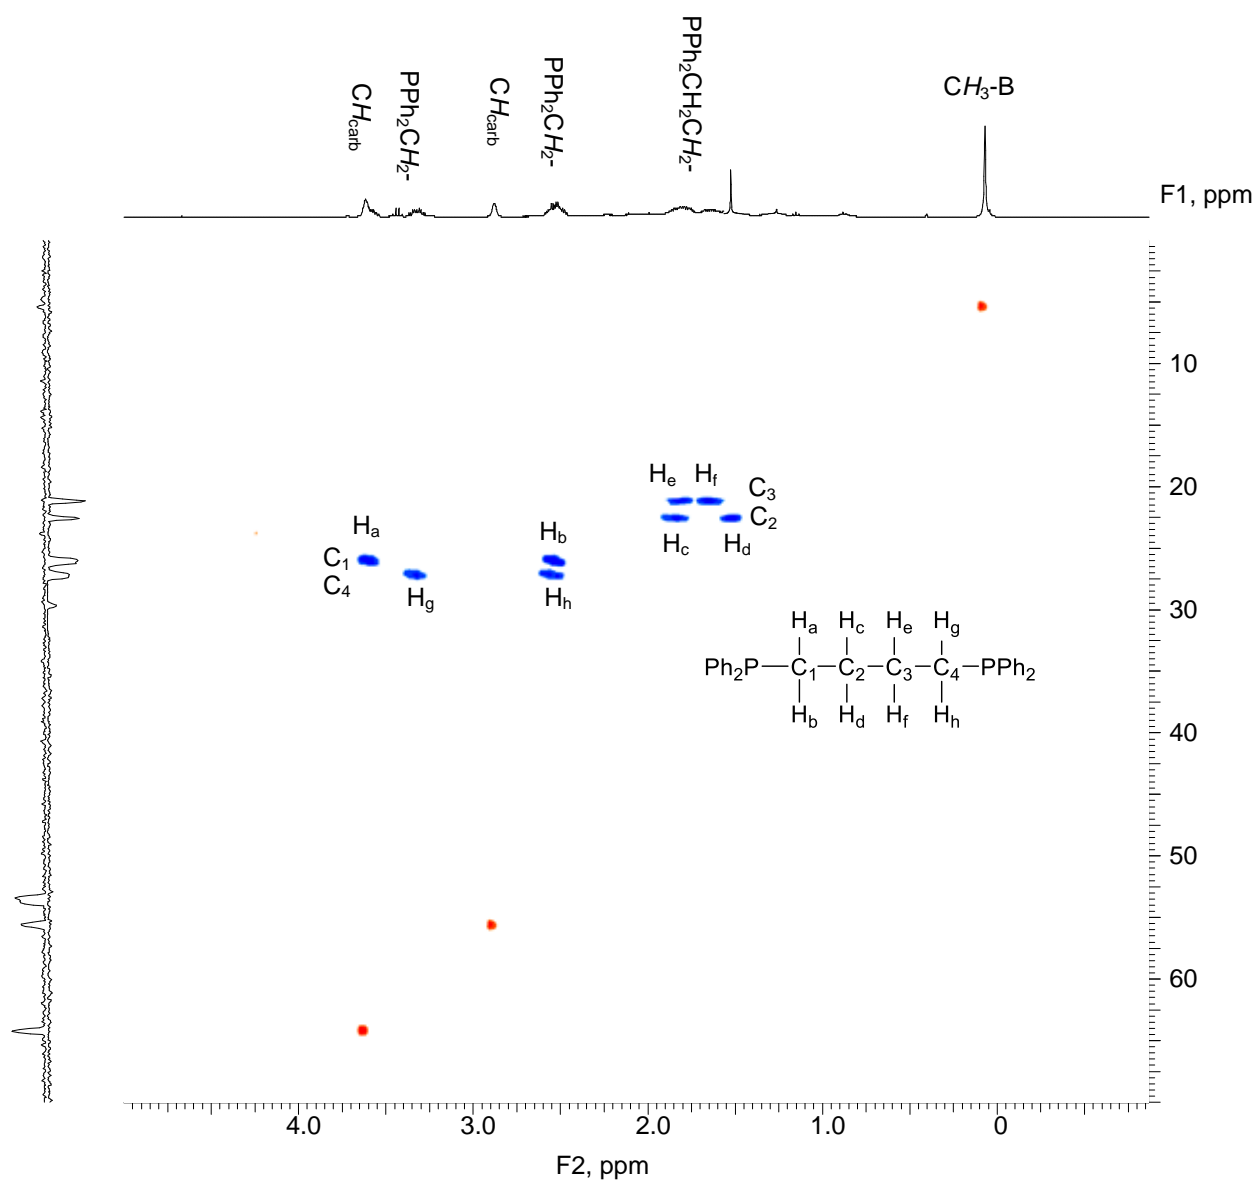

**Figure S16.**  $^1\text{H}$ - $^{13}\text{C}$  2D HSQC NMR spectrum of complex 3

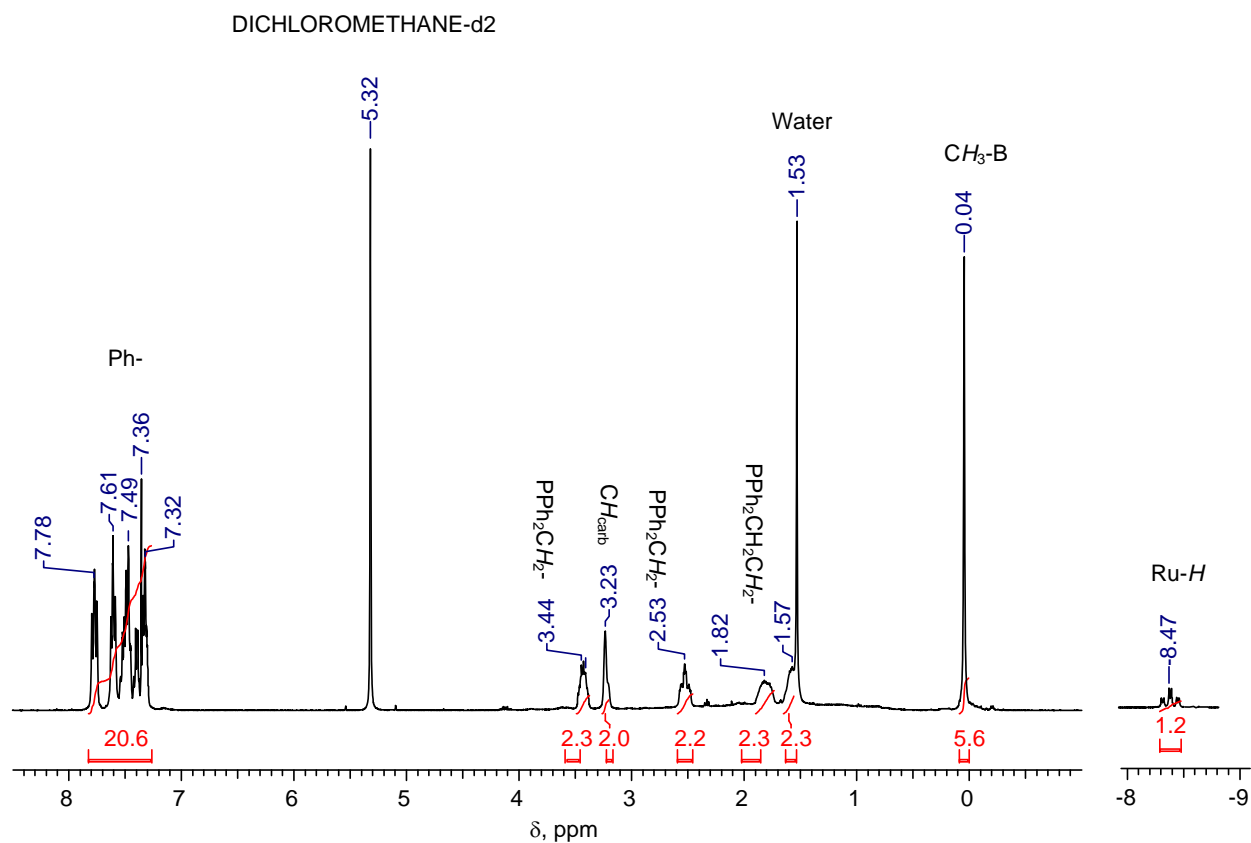

Figure S17. <sup>1</sup>H NMR spectrum of complex 4

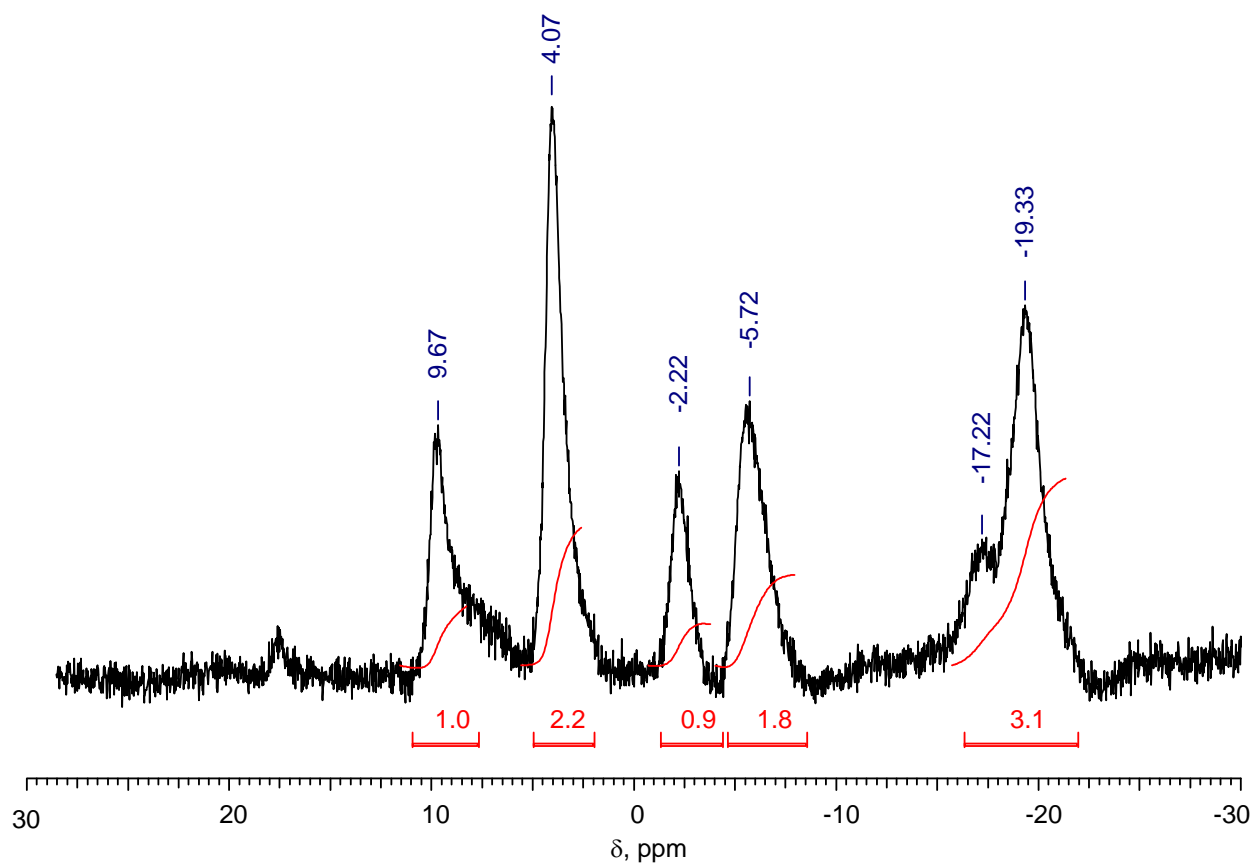

Figure S18. <sup>11</sup>B{<sup>1</sup>H} NMR spectrum of complex 4

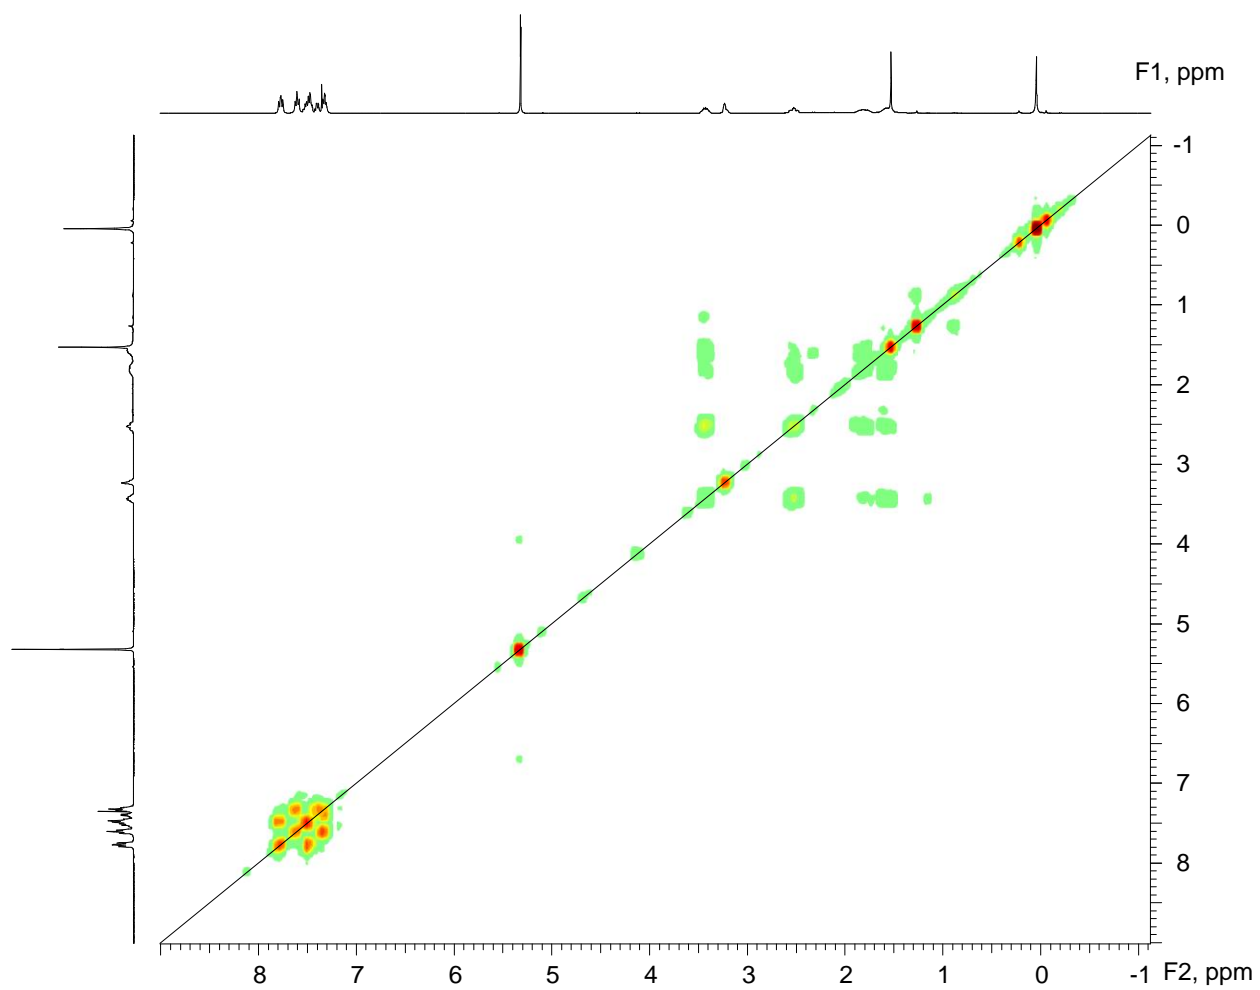

**Figure S19.**  $^1\text{H}$ - $^1\text{H}$  2D COSY NMR spectrum of complex 3

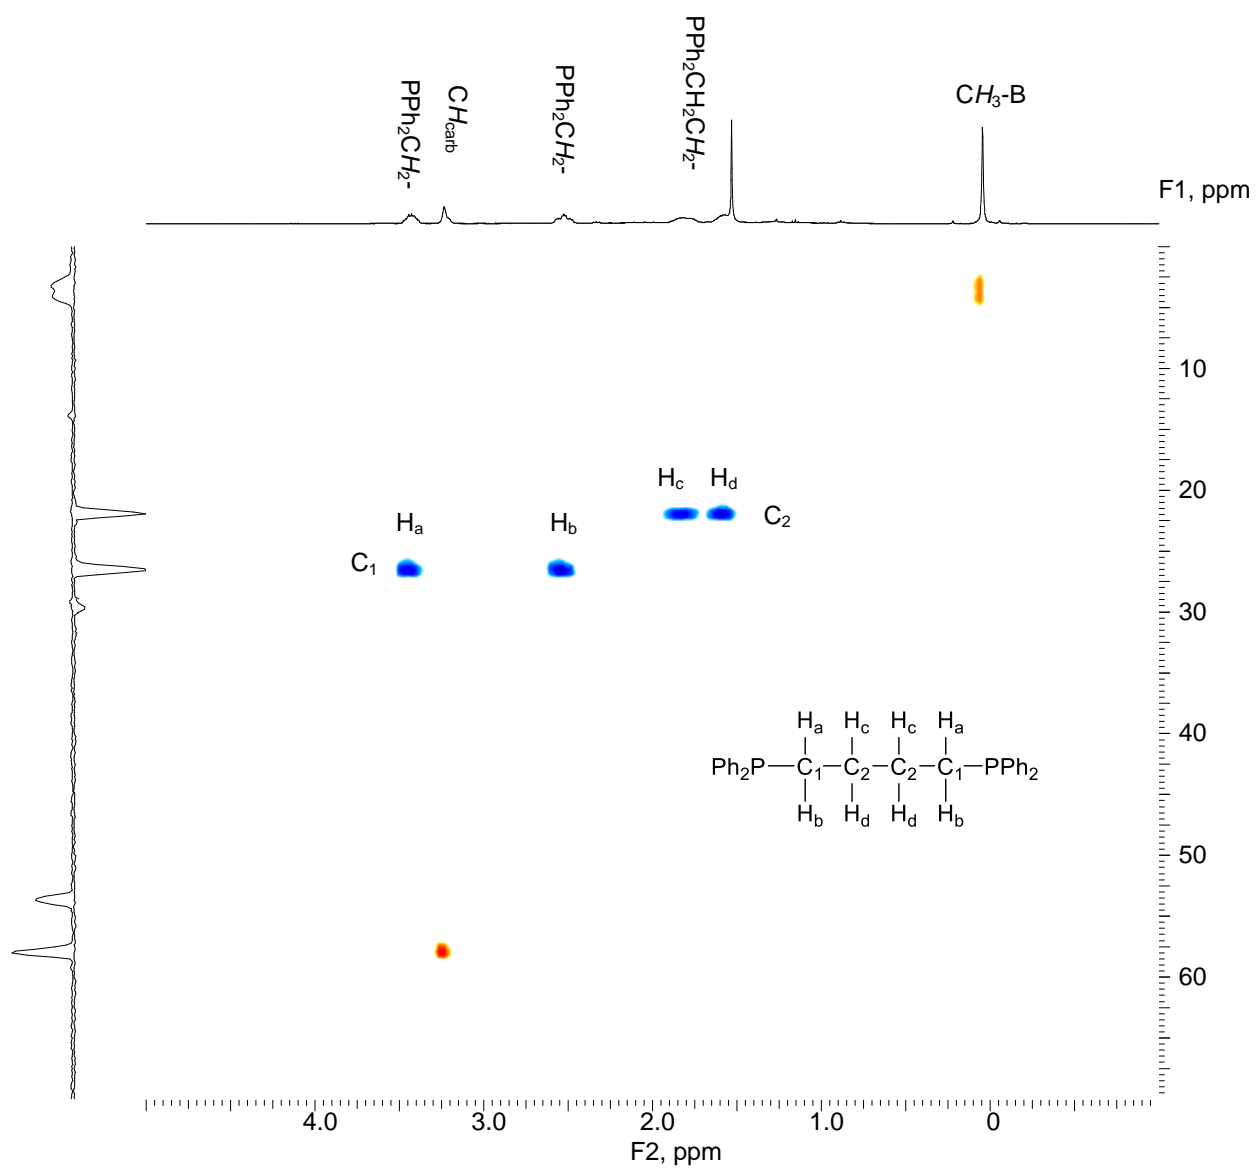

**Figure S20**  $^1\text{H}$ - $^{13}\text{C}$  2D HSQC NMR spectrum of complex 4

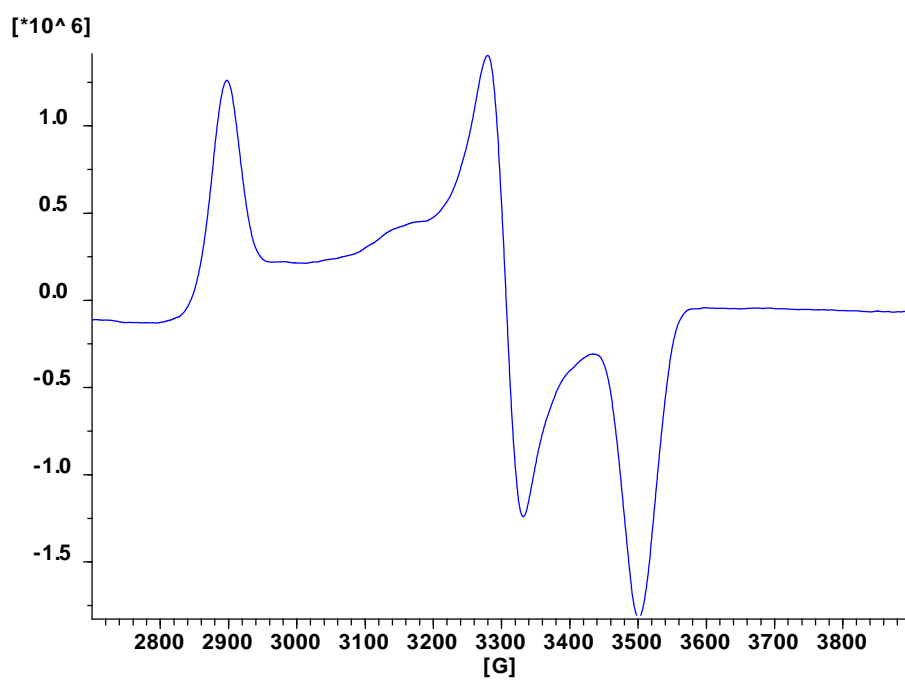

**Figure S21.** Anisotropic EPR spectrum of complex **7** in toluene matrix at 77 K

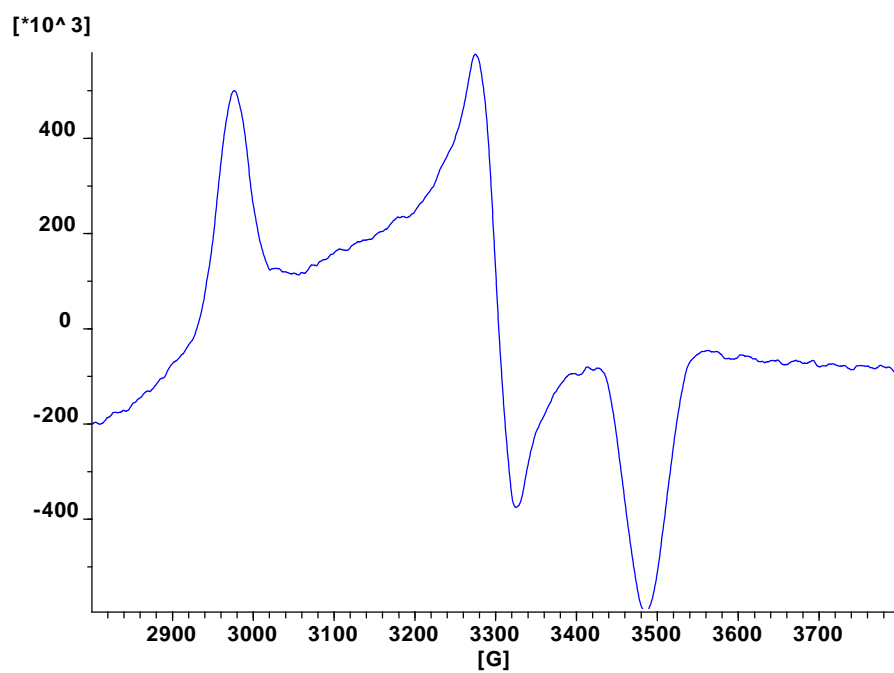

**Figure S22.** Anisotropic EPR spectrum of complex **9** in toluene matrix at 77 K

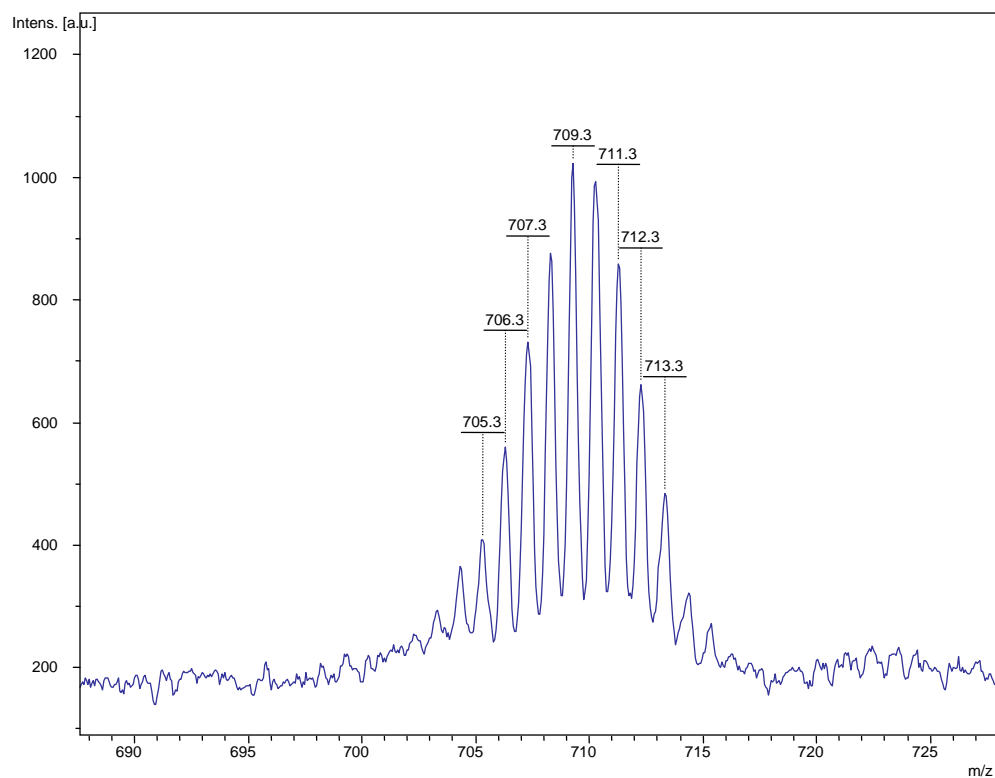

**Figure S23.** MALDI mass spectrum of complex **3** recorded in negative mode using DCTB as a matrix

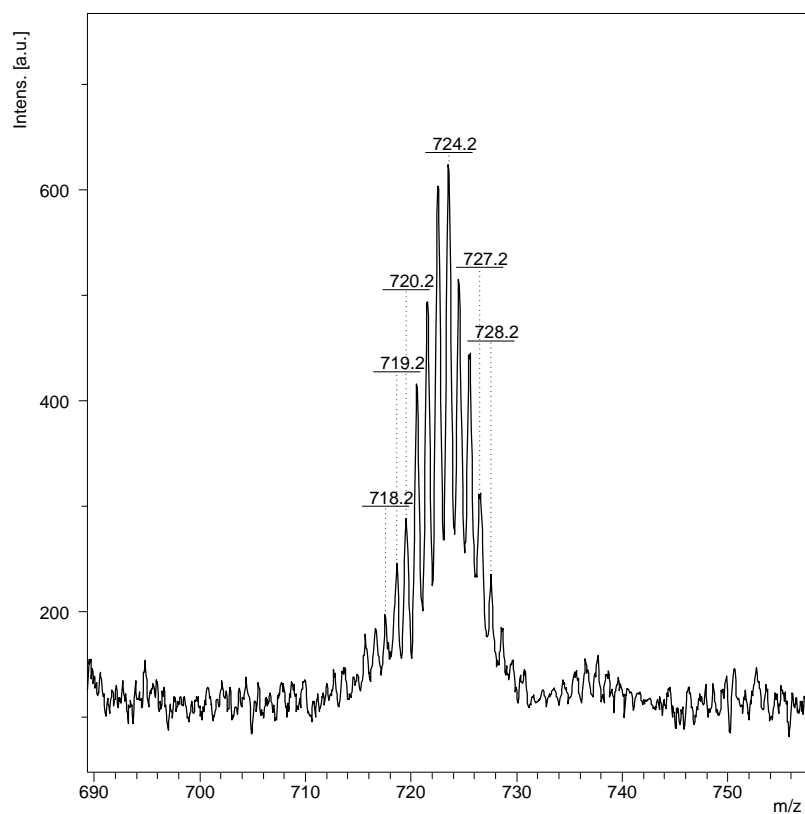

**Figure S24.** MALDI mass spectrum of complex **4** recorded in negative mode using DCTB as a matrix

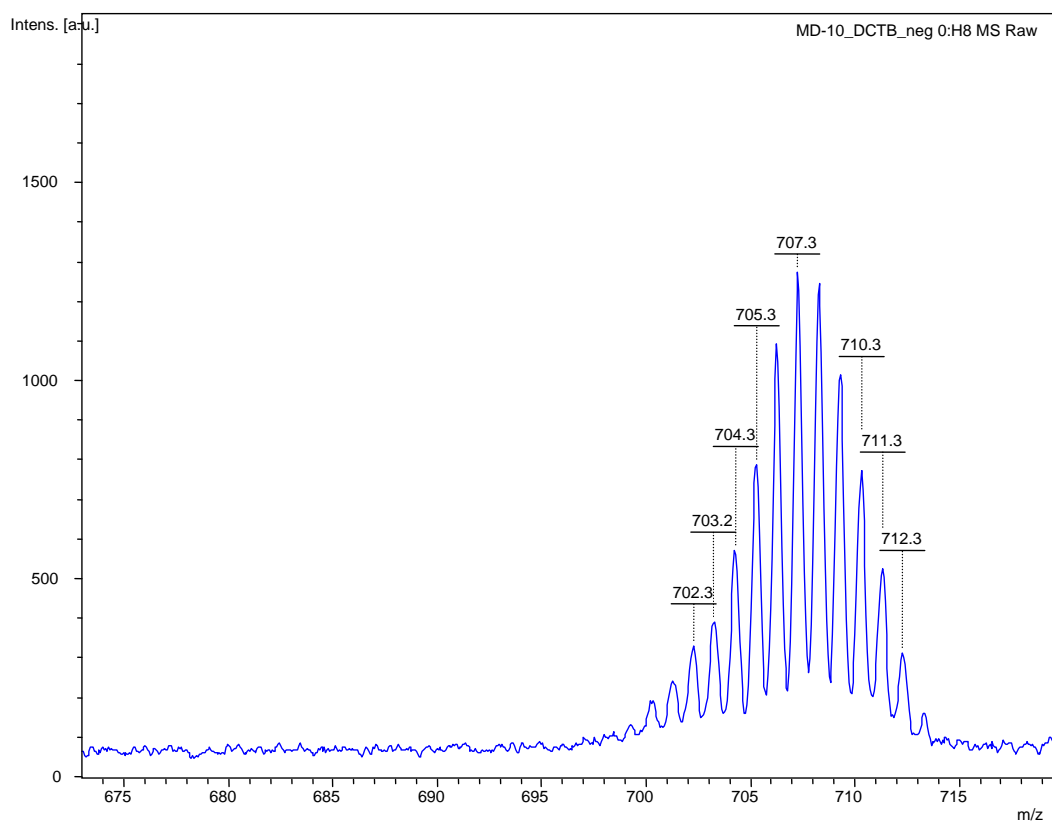

**Figure S25.** MALDI mass spectrum of complex **6** recorded in negative mode using DCTB as a matrix

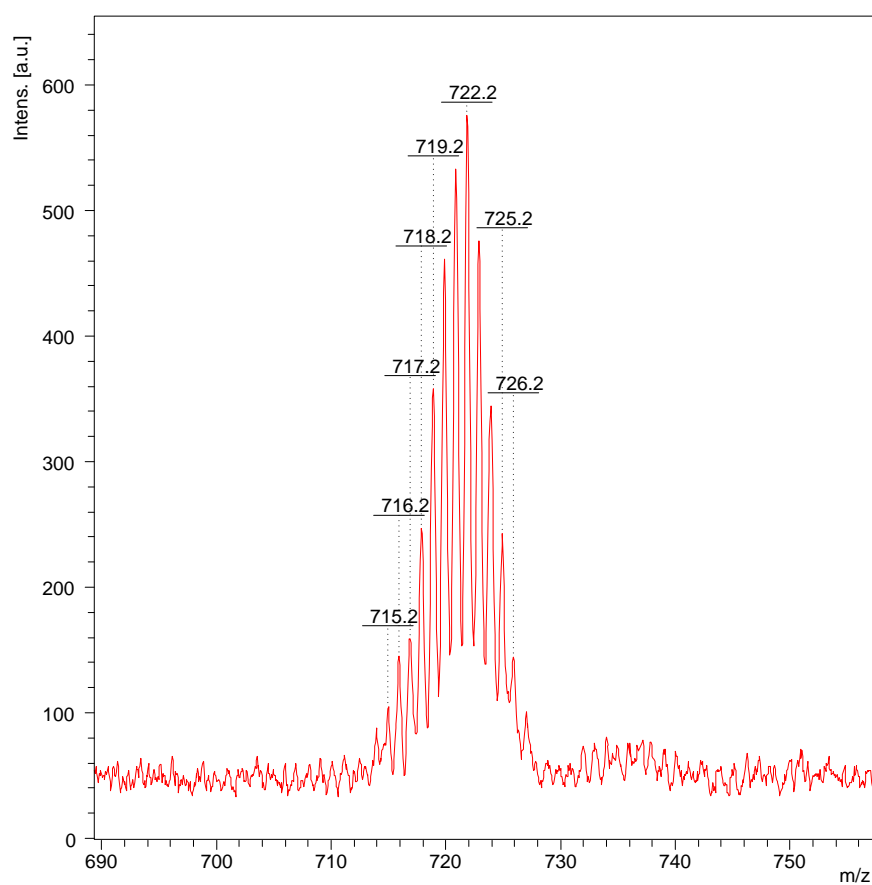

**Figure S26.** MALDI mass spectrum of complex **7** recorded in negative mode using DCTB as a matrix



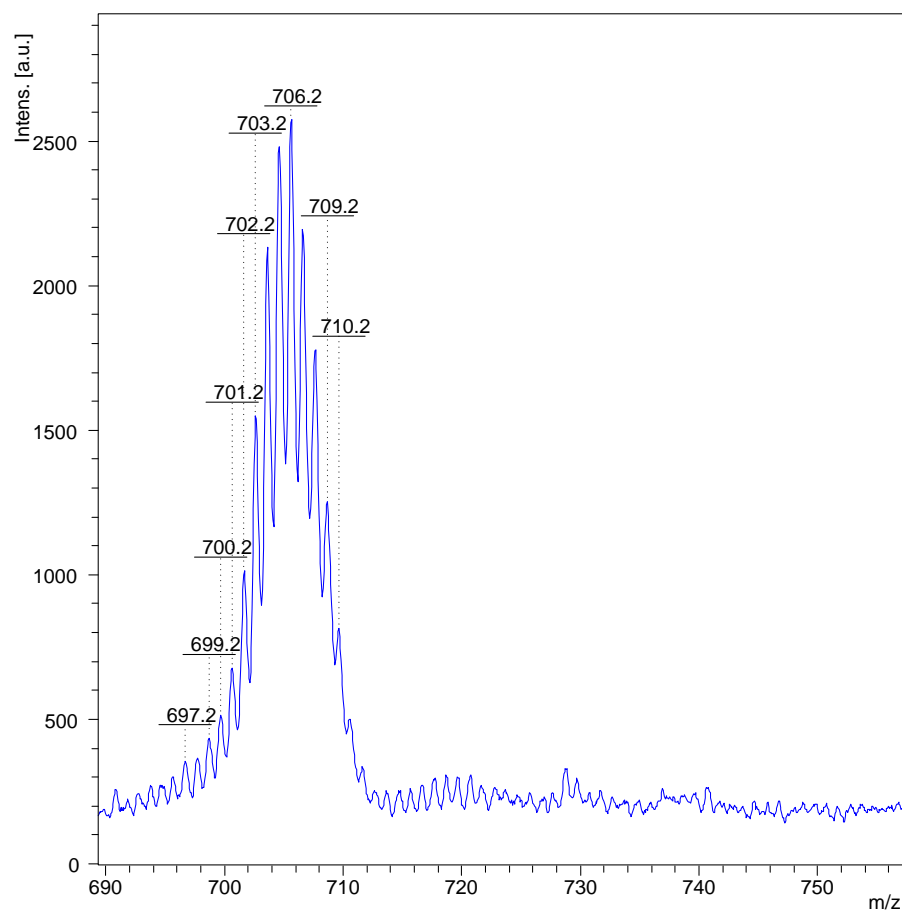

**Figure S27.** MALDI mass spectrum of complex **8** recorded in negative mode using DCTB as a matrix

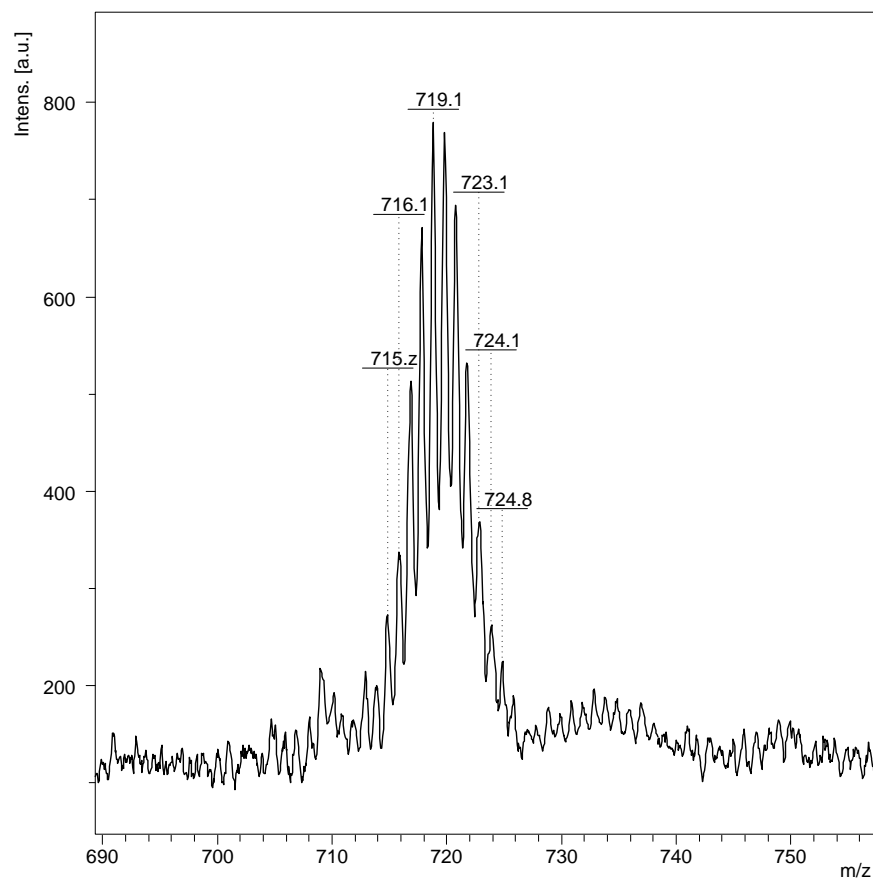

**Figure S28.** MALDI mass spectrum of complex **9** recorded in negative mode using DCTB as a matrix
